# Supplementary material for: Immunometabolic modulation of retinal inflammation by CD36 ligand
Source: PubMed Central journal article supplement (PMC6733801; doi:10.1038/s41598-019-49472-8), 2019-09-09
Supplement: 41598_2019_49472_MOESM1_ESM.pdf [file 41598_2019_49472_MOESM1_ESM.pdf]

## Supplemental Materials for

### **Immunometabolic modulation of retinal inflammation by CD36 ligand**

**Authors:** Katia Mellal<sup>†</sup>, Samy Omri<sup>†</sup>, Mukandila Mulumba, Houda Tahiri, Carl Fortin, Marie-France Dorion, Hung Pham, Yesica Garcia Ramos, Jinqiang Zhang, Sheetal Pundir, Jean-Sébastien Joyal, Jean-François Bouchard, Florian Sennlaub, Maria Febbraio, Pierre Hardy, Simon-Pierre Gravel, Sylvie Marleau, William D Lubell, Sylvain Chemtob\* and Huy Ong\*

\* Corresponding author. Email: [sylvain.chemtob@umontreal.ca](mailto:sylvain.chemtob@umontreal.ca) (S.C.), [huy.ong@umontreal.ca](mailto:huy.ong@umontreal.ca) (H.O.).

<sup>†</sup> These authors contributed equally to this work.

The Supplemental Material file includes:

Fig. S1. MPE-001 downregulates subretinal inflammation and photoreceptor degeneration in light-exposed CX3CR1<sup>-/-</sup> and CX3CR1<sup>-/-</sup>/CD36<sup>-/-</sup> mice.

Fig. S2. Effect of MPE-001 on R-FSL1-stimulated release of cytokines in human macrophages.

Fig. S3. Colocalization of CD36 and TLR2 in lipid rafts and MPE-001 effect on TLR2-signaling

Fig. S4. MPE-001 exerts no effect on macrophage phagocytosis.

Fig. S5. Azapeptide MPE-001 decreases caspase-1 expression in outer retina.

Fig. S6. Immuno-metabolic effects of MPE-001 on macrophages.

Fig. S7. Subretinal MPs in CD36<sup>+/+</sup>/TLR2<sup>+/+</sup> in mice and aging human retina.

Table S1. Percentage of pro-inflammatory cytokine/chemokine reduction in response to MPE-001-treatment in TLR2-stimulated peritoneal macrophages.

Table S2. Percentage of IL-1 $\beta$  reduction in response to MPE-001-treatment on R-FSL1-stimulated peritoneal macrophages.

Table S3. Primers ID and sequences used for quantitative RT-PCR

## Supplemental figures

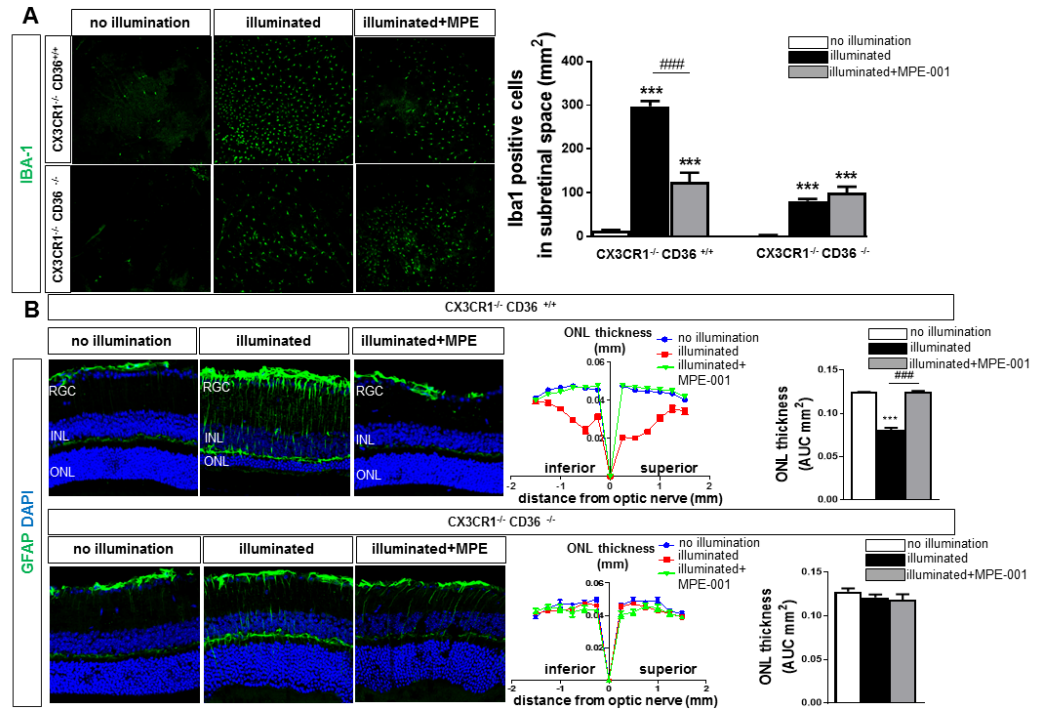

### Figure S1. MPE-001 downregulates subretinal inflammation and photoreceptor degeneration in light-exposed CX3CR1<sup>-/-</sup> and CX3CR1<sup>-/-</sup>/CD36<sup>-/-</sup> mice.

(A) Evidence of CD36 involvement in light-induced accumulation of subretinal macrophages. Representative RPE/Chr/Scl flat mounts, illustrating the accumulation of IBA-1+ cells (green) in the subretinal space of CX3CR1<sup>-/-</sup> or CX3CR1<sup>-/-</sup>/CD36<sup>-/-</sup> mice illuminated with blue light for 5 days and treated or not with 289 nmol/kg per day of MPE-001 from day 1 to day 7. Quantification of IBA-1+ cells in the subretinal space of mice unexposed, illuminated with blue light, and treated or not with MPE-001 (n = 3-4 mice per group). (B) Evidence of CD36 involvement in light-induced degeneration of ONL. GFAP staining (green) in retinal cryosections from CX3CR1<sup>-/-</sup> or CX3CR1<sup>-/-</sup>/CD36<sup>-/-</sup> mice exposed or not to blue light and treated or not with MPE-001. ONL thickness measurements and spider graph representations showing both side of the optic nerve from CX3CR1<sup>-/-</sup>/CD36<sup>+/+</sup> or CX3CR1<sup>-/-</sup>/CD36<sup>-/-</sup> mice unexposed or exposed to blue light for 5 days and treated or not with 289 nmol/kg per day of MPE-001 from day 1 to day 7. Area under the curves from ONL thickness measurement. One-way ANOVA with Newman-Keuls for multiple comparisons was performed. \*\*\*  $P < 0.001$  vs no illumination, ###  $P < 0.001$  vs illuminated group. Data are shown as mean  $\pm$  S.E.M. ONL: Outer Nuclear Layer, INL: Inner Nuclear Layer, GCL: Ganglion Cell Layer.

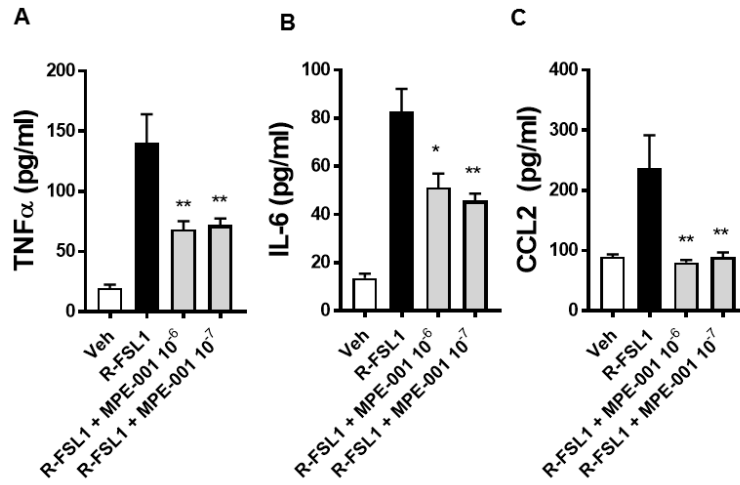

**Figure S2. Effect of MPE-001 on R-FSL1-stimulated release of cytokines in human macrophages.**

(A - C) TNF $\alpha$ , IL-6 and CCL2 in supernatants of human macrophages after 4 h stimulation with 300 ng/ml R-FSL1 in the presence of MPE-001 or vehicle. One-way ANOVA with Newman-Keuls post-test for multiple comparisons was performed. Data are representative of 2 independent experiments (n = 4 per group). \*  $P < 0.05$ , \*\*  $P < 0.01$  vs R-FSL1. Data are shown as mean  $\pm$  S.E.M.

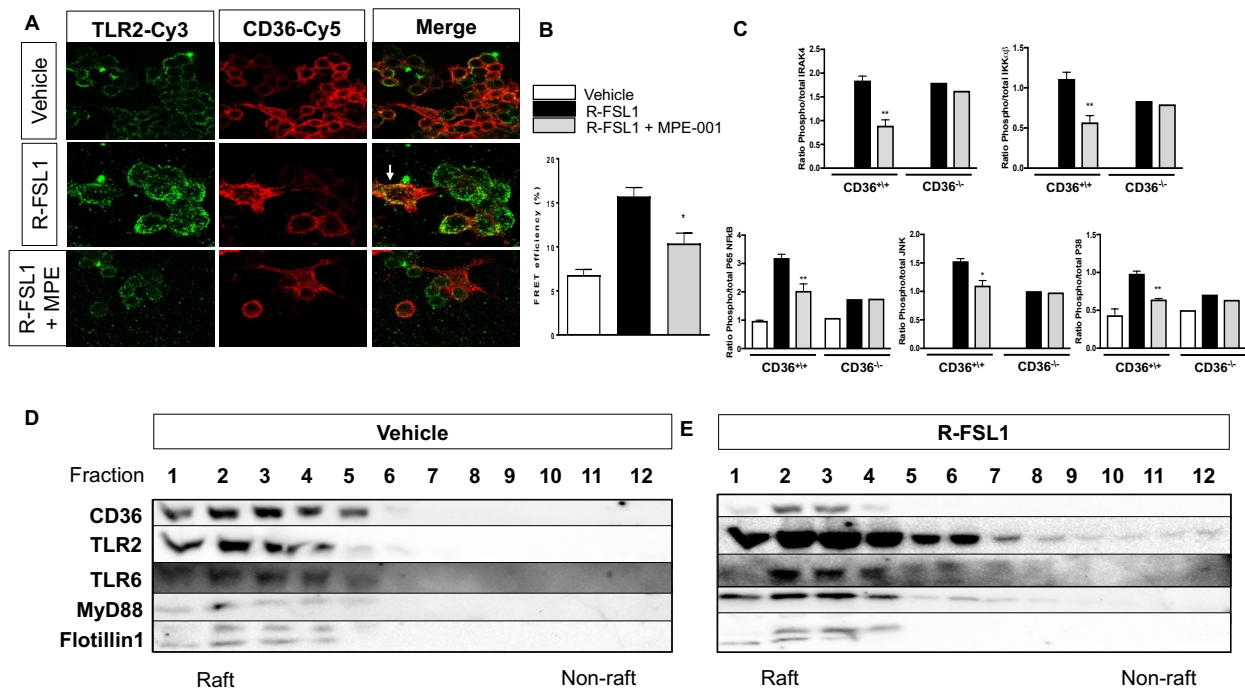

**Figure S3. Colocalization of CD36 and TLR2 in lipid rafts and MPE-001 effect on TLR2-signaling.**

(A) RAW macrophages were stimulated with 300 ng/ml R-FSL1 and treated with  $10^{-7}$  M MPE-001 for 10 min. Azapeptide MPE-001 disrupted the interaction between CD36 labeled with Cy5 (red), TLR2 labeled with Cy3 (green) and merge shown in yellow as assessed by fluorescence resonance energy transfer (FRET), measured using LSM-700 (Zeiss) confocal microscope. (B) Quantification of FRET efficiency expressed as the percentage of energy transfer. Data are representative of 3 independent experiments ( $n = 10-30$  per group). (C) Densitometric analysis data of western blots shown in Fig. 4E. (D, E) CD36 and TLR2 colocalization in lipid rafts after R-FSL1 stimulation. Peritoneal macrophages were treated with vehicle (D) or stimulated with 300 ng/ml R-FSL1 (E) for 5 min and subjected to sucrose density gradient ultracentrifugation. Data are representative of 3 experiments. The relative positions of the raft and non-raft (soluble) fractions are indicated. One-way ANOVA with Newman-Keuls post-test for multiple comparisons was performed.  $*P < 0.05$ . Data are shown as mean  $\pm$  S.E.M.

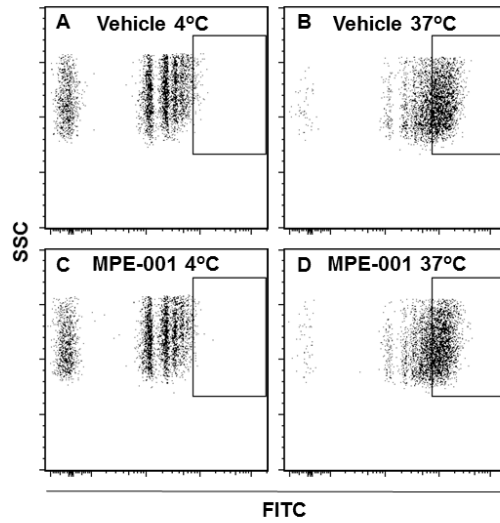

**Figure S4. MPE-001 exerts no effect on macrophage phagocytosis.**

(A-D) Proinflammatory induced-BMDM were incubated with yellow-green microspheres at 4°C, to determine background values (A, C); or at 37°C, to measure the phagocytosed microspheres (B, D). Phagocytosis is expressed as the relative number of cells that have ingested fluorescent beads in vehicle (A, B), or after MPE-001 treatment (C, D). Data are representative of 2 independent experiments.

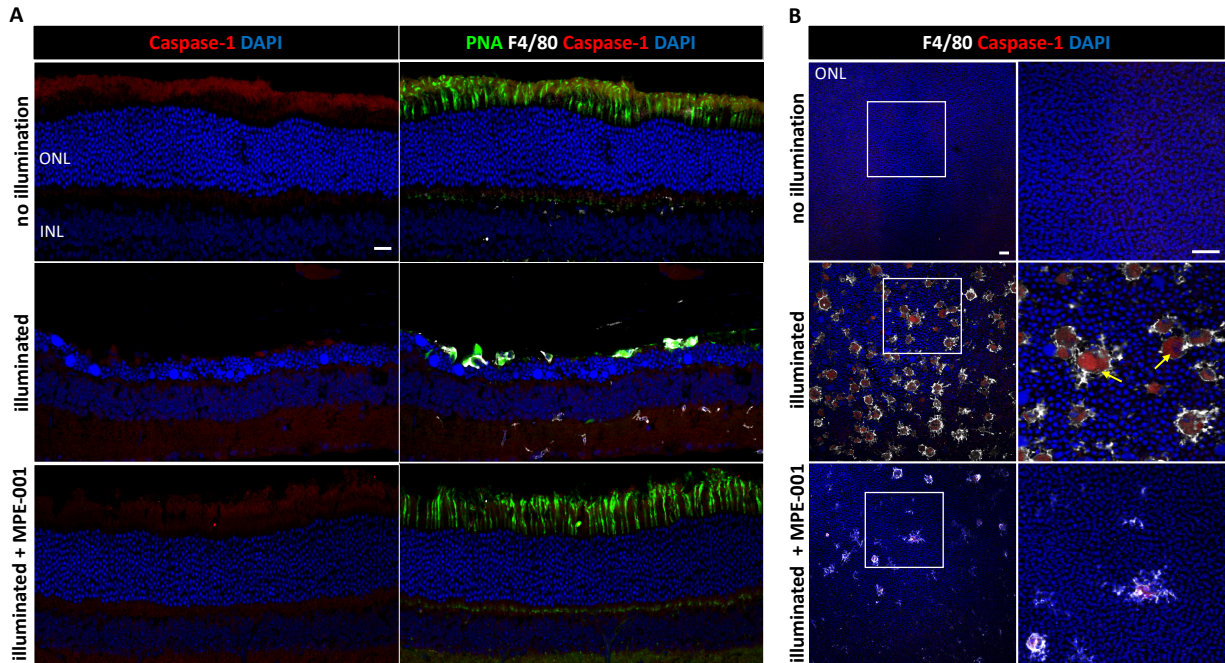

**Figure S5. Azapeptide MPE-001 decreases caspase-1 expression in outer retina.** Confocal microscopy of retina cryosection (A) and neuroretinal flat mounts (photoreceptors side) (B) from illuminated CD36<sup>+/+</sup> mice treated or not with MPE-001 stained with caspase-1 (red), PNA (green) and F4/80 (white); nuclei were counterstained with DAPI (blue). Magnifications of white square show caspase-1 distribution in outer retina. Yellow arrows show caspase-1 expression in subretinal F4/80+ cells. Scale: 10  $\mu$ m.

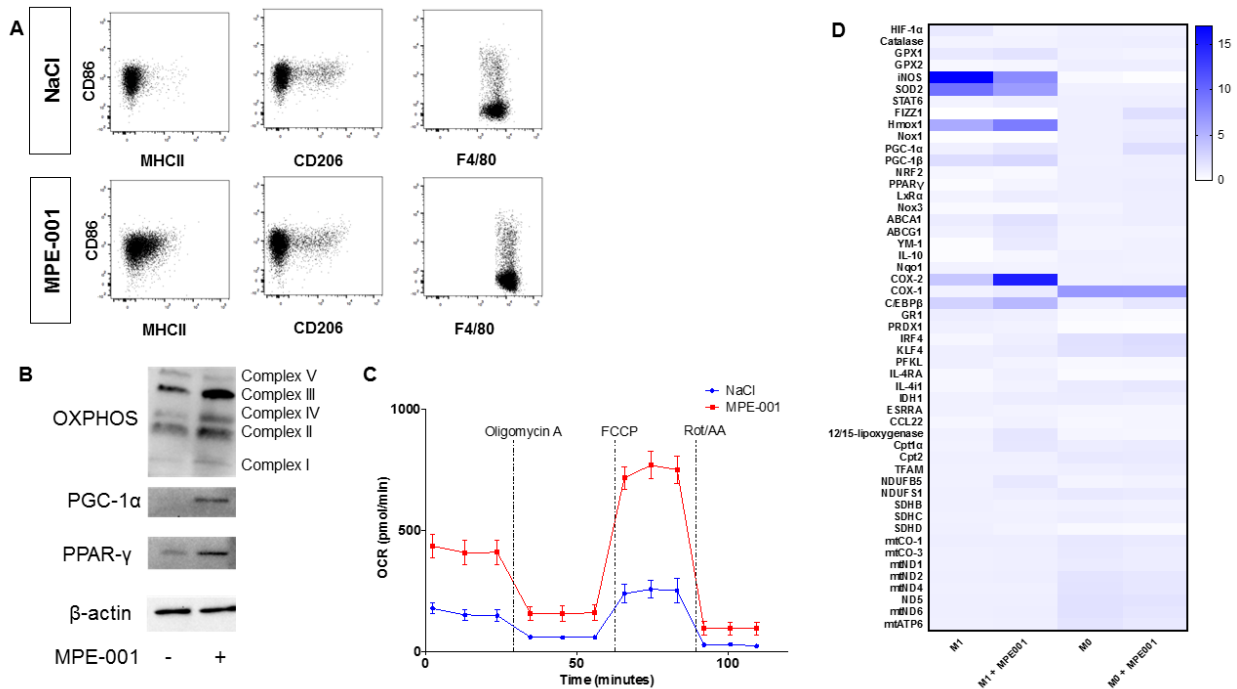

**Figure S6. Immuno-metabolic effects of MPE-001 on macrophages.**

(A-C) Peritoneal macrophages were isolated from WT mice treated daily *s.c.* injection of MPE-001 (289 nmol/kg) or NaCl for 7 days. (A) Phenotypic analysis of isolated peritoneal macrophages by flow cytometry using MHCII, CD86 and CD206 markers. (B) Protein expression of mitochondrial electron transport chain (mtETC) complex subunits (OXPHOS), PGC-1 $\alpha$  and PPAR- $\gamma$ . (C) OCR analysis of peritoneal macrophages. Data in A-C are representative of 4 independent experiments. (D) The heat map of 51 genes expression from M1 and M0 BMDM treated with vehicle or MPE-001 ( $10^{-7}$  M) for 24 h and analyzed by qPCR (n = 3 per group).

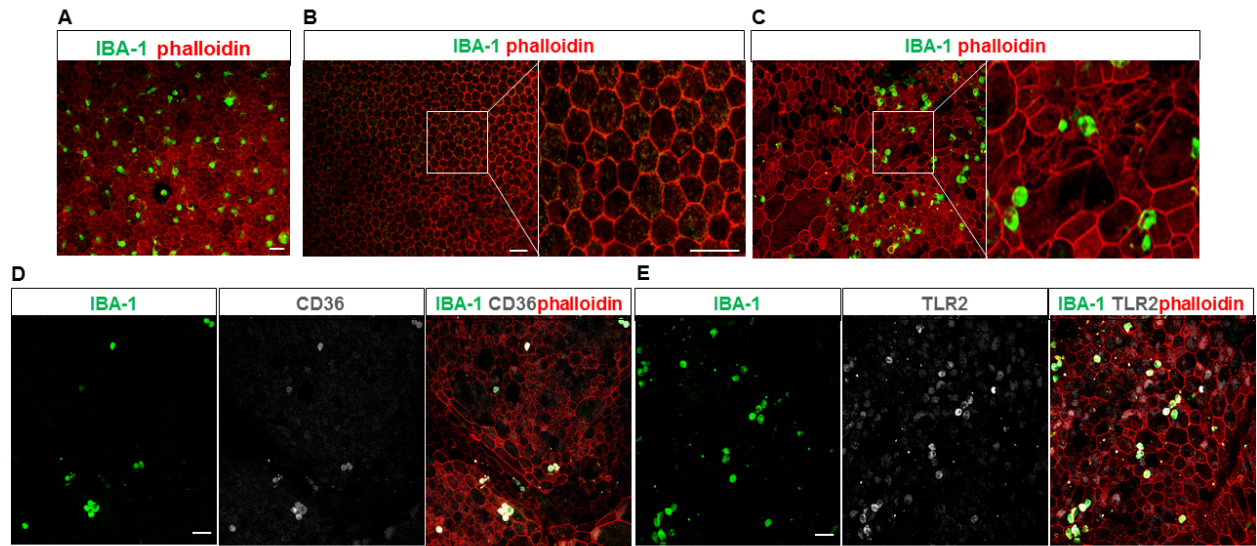

**Figure S7 : Subretinal MPs in  $CD36^{+/+}/TLR2^{+/+}$  in mice and aging human retina. (A-D)** Confocal microscopy of RPE flat mounts obtained from illuminated  $CD36^{+/+}/TLR2^{+/+}$  mouse or aging human donors. **(A)** Double-labeling of subretinal MPs of RPE flat mounts from illuminated mouse showing IBA-1 (green) and phalloidin (for F-actin, red). **(B, C)** Double-labeling of subretinal MPs of RPE flat mounts from human subjects aged 77 **(B)** and 79 **(C)** years old, without and with subretinal inflammation, respectively. Immunofluorescence showing IBA-1 (green) and phalloidin (for F-actin, red). **(C)** White squares magnification (3-fold) show RPE cell morphology (red). **(D)** Triple labeling of subretinal MPs with IBA-1 (green), CD36 (white) and phalloidin (for F-actin, red), of RPE flat mount from a 79-year-old subject with eye inflammation. **(E)** Triple labeling of subretinal MPs with IBA-1 (green), TLR2 (white) and phalloidin (for F-actin, red), of RPE flat mount from a 79-year-old subject with eye inflammation. Scale bar = 100  $\mu\text{m}$ .



## Supplementary tables

**Table S1.** Percentage of pro-inflammatory cytokine/chemokine reduction in response to MPE-001-treatment in TLR2-stimulated peritoneal macrophages.

|        | TNF $\alpha$        | IL-6                | CCL2                | IL-12               |
|--------|---------------------|---------------------|---------------------|---------------------|
| R-FSL1 | 38.4 ( $P < 0.01$ ) | 37.6 ( $P < 0.01$ ) | 41.5 ( $P < 0.01$ ) | 39.2 ( $P < 0.01$ ) |
| LTA    | 24.5 ( $P < 0.01$ ) | 35.0 ( $P < 0.01$ ) | 31.9 ( $P < 0.01$ ) | 29.1 ( $P < 0.01$ ) |
| pgLPS  | 38.4 ( $P < 0.01$ ) | 42.3 ( $P < 0.01$ ) | 30.9 ( $P < 0.01$ ) | 33.4 ( $P < 0.01$ ) |

**Table S2.** Percentage of IL-1 $\beta$  reduction in response to MPE-001-treatment on R-FSL1-stimulated peritoneal macrophages.

|                          | IL-1 $\beta$        |
|--------------------------|---------------------|
| MPE-001 10 <sup>-9</sup> | 39.2 ( $P < 0.05$ ) |
| MPE-001 10 <sup>-8</sup> | 62.7 ( $P < 0.01$ ) |
| MPE-001 10 <sup>-7</sup> | 74.4 ( $P < 0.01$ ) |

**Table S3.** Primers ID and sequences used for quantitative RT-PCR.

| Oligo ID | Gene     | UPL Probe | Oligo FWD                 | Oligo REV                  | RefSeq                                      | Slope |
|----------|----------|-----------|---------------------------|----------------------------|---------------------------------------------|-------|
| IR5845   | Chil3    | 88        | ggtctgaaagacaagaactgag    | gagaccatggcaactgaacg       | NM_009892.3                                 | 3,2   |
| IR0878   | Hif1a    | 18        | catgatggctcccttttca       | gtcaactgggtctgcaata        | NM_010431.1                                 | 3,59  |
| IR1044   | Cat      | 68        | gcgaccagatgaagcagtg       | gtggtaaggacatcaggctctc     | NM_009804.1                                 | 3,4   |
| IR1055   | Gpx1     | 2         | tttccgtgcaatcagttc        | tcggacttactgagggaat        | NM_008160.2                                 | 3,5   |
| IR1068   | Nos2     | 13        | ctttccacggagcagac         | tcattgtactctgagggtgac      | NM_010927.1                                 | 3,2   |
| IR1084   | Sod2     | 3         | gaccattgcaaggaaaca        | gtagtaagcgtctcccacac       | NM_013671.3                                 | 3,3   |
| IR1262   | Stat6    | 3         | tcctggtcacagttcaataagg    | caaaccactgccaaactgtg       | NM_009284.1                                 | 3,52  |
| IR2537   | Retnla   | 51        | ccctccactgtaacgaagactc    | cacaccagtagcagtcattcc      | NM_020509.3                                 | 3,44  |
| IR4021   | Ppargc1a | 29        | gaaagggcacaacagagaga      | gtaaatcacagcgctctct        | NM_008904.2, NR_027710.1                    | 3,19  |
| IR4024   | Nfe2l2   | 18        | catgtggacttgagttgc        | cctccaaaggatgcaatcaa       | NM_010902.3                                 | 3,43  |
| IR4352.3 | Pparg    | 67        | caagcctttaccacagttga      | caggttctacttctgactcatt     | NM_001127330.1, NM_011146.3                 | 3,5   |
| IR5347   | Nr1h3    | 52        | gagtgctgacttgcacaatg      | cgatctgttctctgacacg        | NM_013839.4                                 | 3,6   |
| IR6026   | Ptgs2    | 83        | caatgtgcaagatccacagc      | gtctggatggaggagcact        | NM_011198.4                                 | 3,48  |
| IR4022   | Ppargc1b | 88        | gacgtggacagcttctact       | gagcgtcagagcttctgttt       | NM_133249.2                                 | 3.40  |
| IR5843   | Abca1    | 26        | atggagcagggaagaccac       | gtaggcctgcccagaagt         | NM_013454.3                                 | 3.2   |
| IR5844   | Abcg1    | 64        | tgctgtcactcacctatgtaa     | ttcccaggataccctgtcc        | NM_009593.2                                 | 3.3   |
| IR1075   | Prdx1    | 15        | gtgagactgtggctcgac        | gttccatctggcataacagc       | NM_011034.2                                 | 3.3   |
| IR5846.2 | Il10     | 48        | cagccgggaagacaataact      | gtttgccagctggtctttg        | NM_010548.2                                 | 3.3   |
| IR6027   | Cebpd    | 32        | ctgaacgacctatacctcagacc   | gcaggtcccaagaaactagc       | NM_007679.4                                 | 3,38  |
| IR1062   | Gr1      | 64        | gttcctcagagaccagat        | tccagctgaaagaccatc         | NM_010344.3                                 | 4     |
| IR1075   | Prdx1    | 15        | gtgagactgtggctcgac        | gttccatctggcataacagc       | NM_011034.2                                 | 3,3   |
| IR2319   | Irf4     | 26        | accatgacagcacttat         | gggtggcatctgattatga        | NM_013674.1                                 | 3,59  |
| IR2899   | Klf4     | 62        | cggaagaggagaagacact       | gagttctcagccaacg           | NM_010637.3                                 | 3,33  |
| IR3771   | Cox1     | 101       | cagaccgcaactaaacaca       | gggtcccaagaatcagaata       | 5912286                                     | 3,1   |
| IR3773   | Cox3     | 88        | cataaatcaagcctactaattacat | ctgaaatggagaatgatgttca     | NP_904334.1                                 | 3,12  |
| IR3774   | Nd1      | 29        | acacttattacaaccaagaacacat | tcatattatggctatgggtcagg    | NP_904328.1                                 | 3,18  |
| IR3775   | Nd2      | 67        | ccataactcaactctcactctatg  | gaatcctgttagtgggaagg       | NP_904329.1                                 | 3,27  |
| IR3776   | Nd4      | 86        | gcttaaacgaggattatt        | gggttctacatgttttgg         | NP_904337.1                                 | 3,12  |
| IR3777.2 | Nd5      | 31        | agcattcggagactctttg       | tttgaggactggaatgctg        | NP_904338.1                                 | 3,29  |
| IR3778   | Nd6      | 12        | cacaactatattgctcctacc     | ttggttggagattggttg         | NP_904339.1                                 | 3,15  |
| IR3779   | Atp6     | 78        | tcataaatctaagtatagccttcca | ttttgtcggaaagcctgtaa       |                                             | 3,25  |
| IR4074   | Tfam     | 94        | caaaggatgattcgctcag       | aagctgaaatattcctgtctttc    | NM_009360.4                                 | 3,3   |
| IR4346   | Ndufb5   | 68        | cctgctatcctccaagattg      | cgcatcagccttccaact         | NM_025316.2                                 | 3,4   |
| IR4349   | Cox5b    | 26        | gtgggttccccactgatga       | tgaagctccttggaggta         | NM_009942.2                                 | 3,6   |
| IR5344   | Cpt2     | 66        | ccaaagaagcagcagtg         | tagagctcagcagggta          | NM_009949.2                                 | 3,4   |
| IR5345   | Cd36     | 75        | ccaagctattgacacatgatt     | ttcaatgtccgagactttca       | NM_001159558.1                              | 3,33  |
| IR5353   | Cox7b    | 21        | aacgcactaagccgtctcc       | catgaaactaggtccctct        | NM_025379.2                                 | 3,12  |
| IR5354   | Ndufab1  | 78        | tgcatgataagaagatgtgtatgaa | ttcactctgtgtcagttgtga      | NM_028177.3                                 | 3,3   |
| IR5355   | Ndufb6   | 31        | agctcgaagcccaggatatt      | cttcaatgatgttgcagagaaa     | NM_001033305.2                              | 3,37  |
| IR5356   | Ndufs1   | 60        | tgactctgacacttatgactga    | aagataattggaactgaagctgtacc | NM_145518.2, NM_001160038.1, NM_001160039.1 | 3,33  |
| IR5358   | Sdhb     | 42        | ctggtgaaacggagacaagt      | gcgttctctgtgaactctg        | NM_023374.3                                 | 3,38  |
| IR5359   | Sdhc     | 68        | cactgaatgctcagctttgt      | ttccagaaacgctcactct        | NM_025321.3                                 | 3,3   |
| IR5360   | Sdhd     | 3         | tctgcttggggctgat          | cccatgaacgtatcggtaac       | NM_025848.3                                 | 3,3   |
| IR5365   | Pfkf     | 42        | attgaccggatggaag          | aagcccagcctgaacc           | NM_008826.4                                 | 3,22  |
| IR5641   | Cpt1a    | 56        | cttcaactctccgcatcc        | gcctctgtgtacacgacaat       | NM_013495.2                                 | 3,3   |
| IR5972   | Il4ra    | 97        | gagtgaggctctagcatcacg     | cagaggcaggagatgggtga       | NM_001008700.3                              | 3,34  |
| IR6088   | Me1      | 16        | cagaggccctgagatgacg       | ccgattggcaaaattctcaa       | NM_008615.2, NM_001198933.1                 | 3,49  |
| IR6089   | Pgd      | 48        | aaagatccgggacagtgct       | gagcaaaagacagcttccaa       | NM_001081274.2                              | 3,13  |
| IR6090   | Esrra    | 45        | gaccttggcagtagctgga       | tggcgtacagcttctcaggt       | NM_007953.2                                 | 3,36  |
| IR6227.2 | Ccl22    | 53        | gccagactacatcctgca        | cggttcttgcggttatcaaa       | NM_009137.2                                 | 3,42  |
| IR6228   | Il4i1    | 45        | gggccaatcggacttc          | caatcctgttatctcctcca       | NM_010215.3                                 | 3,6   |
| IR6229   | Idh1     | 77        | tcgaaagtgacatacatggtaca   | ttgaaagaaactgtgtgcaa       | NM_010497.3, NM_001111320.1                 | 3,26  |
| IR6230   | Ptgs1    | 76        | actgtggatgcttctctc        | tctcggactccttgatgac        | NM_008969.4                                 | 3,18  |
| IR6231.2 | Alox15   | 10        | gagatgggttgcagggtg        | gatgaagtggcaagcctga        | NM_009660.3                                 | 3,8   |
| IR3659.3 | Actb     | 56        | aagccaacgtgaaaagat        | gtggtacgaccagaggcatac      | NM_007393.3                                 | 3,33  |
| IR3669.2 | Gapdh    | 80        | gtctcgtctggatctgac        | cctgtccaccactcttctg        | NM_008084.2                                 | 3,55  |
